# Supplementary material
Source: HighWire-hosted journal article supplement (https://cmaj.ca/highwire/filestream/58361/field_highwire_adjunct_files/0/deficitappendix.pdf)
Supplement: deficitappendix.pdf [file deficitappendix.pdf]

---

## Appendix 2: Reports of trials ( $n = 62$ ) included in our meta-analysis

---

- Kolko DJ, Bukstein OG, Barron J. Methylphenidate and behavior modification in children with ADHD and comorbid ODD or CD: main and incremental effects across settings. *J Am Acad Child Adolesc Psychiatry* 1999;38:578-86.
- Pelham WE, Aronoff HR, Midlam JK, Shapiro CJ, Gnagy EM, Chronis AM, et al. A comparison of ritalin and adderall: efficacy and time-course in children with attention-deficit/hyperactivity disorder. *Pediatrics* 1999;103:e43.
- Sharp WS, Walter JM, Marsh WL, Ritchie GF, Hamburger SD, Castellanos FX. ADHD in girls: clinical comparability of a research sample. *J Am Acad Child Adolesc Psychiatry* 1999;38:40-7.
- Bukstein OG, Kolko DJ. Effects of methylphenidate on aggressive urban children with attention deficit hyperactivity disorder. *J Clin Child Psychol* 1998;27:340-51.
- Smithee JA, Klorman R, Brumaghim JT, Borgstedt AD. Methylphenidate does not modify the impact of response frequency or stimulus sequence on performance and event-related potentials of children with attention deficit hyperactivity disorder. *J Abnorm Child Psychol* 1998;26:233-45.
- Firestone P, Musten LM, Pisterman S, Mercer J, Bennett S. Short-term side effects of stimulant medication are increased in preschool children with attention-deficit/hyperactivity disorder: a double-blind placebo-controlled study. *J Child Adolesc Psychopharmacol* 1998;8:13-25.
- Musten LM, Firestone P, Pisterman S, Bennett S, Mercer J. Effects of methylphenidate on preschool children with ADHD: cognitive and behavioral functions. *J Am Acad Child Adolesc Psychiatry* 1997;36:1407-15.
- Smith BH, Pelham WE, Evans S, Gnagy E, Molina B, Bukstein O, et al. Dosage effects of methylphenidate on the social behavior of adolescents diagnosed with attention-deficit hyperactivity disorder. *Exp Clin Psychopharmacol* 1998;6:187-204.
- Schachar RJ, Tannock R, Cunningham C, Corkum PV. Behavioral, situational, and temporal effects of treatment of ADHD with methylphenidate. *J Am Acad Child Adolesc Psychiatry* 1997;36:754-63.
- Law SF, Schachar RJ. Do typical clinical doses of methylphenidate cause tics in children treated for attention-deficit hyperactivity disorder? *J Am Acad Child Adolesc Psychiatry* 1999;38:944-51.

- Rapport MD, Denney C. Titrating methylphenidate in children with attention-deficit/hyperactivity disorder: Is body mass predictive of clinical response? *J Am Acad Child Adolesc Psychiatry* 1997;36:523-30.

Rapport MD, Denney C, DuPaul GJ, Gardner MJ. Attention deficit disorder and methylphenidate: normalization rates, clinical effectiveness, and response prediction in 76 children. *J Am Acad Child Adolesc Psychiatry* 1994;33:882-93.

Denney C, Rapport MD. Predicting methylphenidate response in children with ADHD: theoretical, empirical, and conceptual models. *J Am Acad Child Adolesc Psychiatry* 1999;38:393-401.

- Sprafkin J, Gadow KD. Double-blind versus open evaluations of stimulant drug response in children with attention-deficit hyperactivity disorder. *J Child Adolesc Psychopharmacol* 1996;6:215-28.
- Buitelaar JK, van der Gaag RJ, Swaab-Barneveld H, Kuiper M. Prediction of clinical response to methylphenidate in children with attention-deficit hyperactivity disorder. *J Am Acad Child Adolesc Psychiatry* 1995;34:1025-32.

Buitelaar JK, van der Gaag RJ, Swaab-Barneveld H, Kuiper M. Pindolol and methylphenidate in children with attention-deficit hyperactivity disorder. Clinical efficacy and side-effects. *J Child Psychol Psychiatry* 1996;37:587-95.

- Gadow KD, Sverd J, Sprafkin J, Nolan EE, Ezor SN. Efficacy of methylphenidate for attention-deficit hyperactivity disorder in children with tic disorder [published erratum appears in *Arch Gen Psychiatry* 1995;52(10):836]. *Arch Gen Psychiatry* 1995;52(6):444-55.

Gadow KD, Nolan EE, Sverd J. Methylphenidate in hyperactive boys with comorbid tic disorder: II. Short-term behavioral effects in school settings. *J Am Acad Child Adolesc Psychiatry* 1992;31:462-71.

Sverd J, Gadow K, Nolan E, Sprafkin J, Ezor SN. Methylphenidate in hyperactive boys with comorbid tic disorder: I. Clinic evaluations. *Adv Neurol* 1992;58:271-81.

- DuPaul GJ, Barkley RA, McMurray MB. Response of children with ADHD to methylphenidate: interaction with internalizing symptoms. *J Am Acad Child Adolesc Psychiatry* 1994;33:894-903.

Barkley RA, DuPaul GJ, McMurray MB. Attention deficit disorder with and without hyperactivity: clinical response to three dose levels of methylphenidate. *Pediatrics* 1991;87:519-31.

- Klorman R, Brumaghim JT, Fitzpatrick PA, Borgstedt AD, Strauss J. Clinical and cognitive effects of methylphenidate on children with attention deficit disorder as a function of aggression/oppositionality and age. *J Abnorm Psychol* 1994;103:206-21.
  - Johnston C, Fine S. Methods of evaluating methylphenidate in children with attention deficit hyperactivity disorder: acceptability, satisfaction, and compliance. *J Pediatr Psychol* 1993;18:717-30.
- Fine S, Johnston C. Drug and placebo side effects in methylphenidate-placebo trial for attention deficit hyperactivity disorder. *Child Psychiatry Hum Dev* 1993;24:25-30.
- Pataki CS, Carlson GA, Kelly KL, Rapport MD, Biancaniello TM. Side effects of methylphenidate and desipramine alone and in combination in children. *J Am Acad Child Adolesc Psychiatry* 1993;32:1065-72.
  - Elia J, Welsh PA, Gullotta CS, Rapoport JL. Classroom academic performance: improvement with both methylphenidate and dextroamphetamine in ADHD boys. *J Child Psychol Psychiatry* 1993;34:785-804.
  - Pelham WEJ, Carlson C, Sams SE, Vallano G, Dixon MJ, Hoza B. Separate and combined effects of methylphenidate and behavior modification on boys with attention deficit-hyperactivity disorder in the classroom. *J Consult Clin Psychol* 1993;61:506-15.
  - Ahmann PA, Waltonen SJ, Olson KA, Theye FW, van Erem AJ, LaPlant RJ. Placebo-controlled evaluation of Ritalin side effects. *Pediatrics* 1993;91:1101-6.
  - DuPaul GJ, Rapport MD. Does methylphenidate normalize the classroom performance of children with attention deficit disorder? *J Am Acad Child Adolesc Psychiatry* 1993;32:190-8.
  - Tannock R, Schachar R. Methylphenidate and cognitive perseveration in hyperactive children. *J Child Psychol Psychiatry* 1992;33:1217-28.
  - Horn WF, Ialongo NS, Pascoe JM, Greenberg G, Packard T, Lopez M, et al. Additive effects of psychostimulants, parent training, and self-control therapy with ADHD children. *J Am Acad Child Adolesc Psychiatry* 1991;30:233-40.
  - Elia J, Borcharding BG, Rapoport JL, Keysor CS. Methylphenidate and dextroamphetamine treatments of hyperactivity: Are there true nonresponders? *Psychiatry Res* 1991;36:141-55.

- Gadow KD, Nolan EE, Sverd J, Sprafkin J, Paolicelli L. Methylphenidate in aggressive-hyperactive boys: I. Effects on peer aggression in public school settings. *J Am Acad Child Adolesc Psychiatry* 1990;29:710-8.
  - Klorman R, Brumaghim JT, Fitzpatrick PA, Borgstedt AD. Clinical effects of a controlled trial of methylphenidate on adolescents with attention deficit disorder. *J Am Acad Child Adolesc Psychiatry* 1990;29(5):702-9.
  - Borcharding BG, Keysor CS, Rapoport JL, Elia J, Amass J. Motor/vocal tics and compulsive behaviors on stimulant drugs: Is there a common vulnerability? *Psychiatry Res* 1990;33:83-94.
  - Pelham WEJ, Greenslade KE, Vodde-Hamilton M, Murphy DA, Greenstein JJ, Gnagy EM, et al. Relative efficacy of long-acting stimulants on children with attention deficit-hyperactivity disorder: a comparison of standard methylphenidate, sustained-release methylphenidate, sustained-release dextroamphetamine, and pemoline. *Pediatrics* 1990;86:226-37.
  - Barkley RA, McMurray MB, Edelbrock CS, Robbins K. Side effects of methylphenidate in children with attention deficit hyperactivity disorder: a systemic, placebo-controlled evaluation. *Pediatrics* 1990;86:184-92.
- Barkley RA, McMurray MB, Edelbrock CS, Robbins K. The response of aggressive and nonaggressive ADHD children to two doses of methylphenidate [published erratum appears in *J Am Acad Child Adolesc Psychiatry* 1990;29:670]. *J Am Acad Child Adolesc Psychiatry* 1989;28:873-81.
- Rapport MD, DuPaul GJ, Kelly KL. Attention deficit hyperactivity disorder and methylphenidate: the relationship between gross body weight and drug response in children. *Psychopharmacol Bull* 1989;25:285-90.
  - Tannock R, Schachar RJ, Carr RP, Chajczyk D, Logan GD. Effects of methylphenidate on inhibitory control in hyperactive children [published erratum appears in *J Abnorm Child Psychol* 1990;18(1):119]. *J Abnorm Child Psychol* 1989;17(5):473-91.
- Tannock R, Schachar RJ, Carr RP, Logan GD. Dose-response effects of methylphenidate on academic performance and overt behavior in hyperactive children. *Pediatrics* 1989;84:648-57.
- Pliszka SR. Effect of anxiety on cognition, behavior, and stimulant response in ADHD. *J Am Acad Child Adolesc Psychiatry* 1989;28:882-7.
  - Pelham WEJ, Walker JL, Sturges J, Hoza J. Comparative effects of methylphenidate on ADD girls and ADD boys. *J Am Acad Child Adolesc Psychiatry* 1989;28:773-6.

Pelham WEJ, Sturges J, Hoza J, Schmidt C, Bijnlsma JJ, Milich R, et al. Sustained release and standard methylphenidate effects on cognitive and social behavior in children with attention deficit disorder. *Pediatrics* 1987;80:491-501.

Johnston C, Pelham W, Hoza J, Sturges J. Psychostimulant rebound in attention deficit disorder boys. *J Am Acad Child Adolesc Psychiatry* 1988;27:806-10.

- Cohen ML, Kelly PC, Atkinson AW. Parent, teacher, child. A trilateral approach to attention deficit disorder. *Am J Dis Child* 1989;143:1229-33.
  - Barkley RA. Hyperactive girls and boys: stimulant drug effects on mother-child interactions [published erratum appears in *J Child Psychol Psychiatry* 1993;34(3):437]. *J Child Psychol Psychiatry* 1989;30(3):379-90.
  - Vyse SA, Rapport MD. The effects of methylphenidate on learning in children with ADHD: the stimulus equivalence paradigm. *J Consult Clin Psychol* 1989;57:425-35.
  - Douglas VI, Barr RG, Amin K, O'Neill ME, Britton BG. Dosage effects and individual responsivity to methylphenidate in attention deficit disorder. *J Child Psychol Psychiatry* 1988;29:453-75.
  - Brown RT, Sexson SB. A controlled trial of methylphenidate in black adolescents. Attentional, behavioral, and physiological effects. *Clin Pediatr (Phila)* 1988;27:74-81.
  - Brown RT, Wynne ME, Borden KA, Clingerman SR, Geniesse R, Spunt AL. Methylphenidate and cognitive therapy in children with attention deficit disorder: a double-blind trial. *J Dev Behav Pediatr* 1986;7:163-74.
  - Rapport MD, DuPaul GJ, Stoner G, Jones TJ. Comparing classroom and clinic measures of attention deficit disorder: differential, idiosyncratic, and dose-response effects of methylphenidate. *J Consult Clin Psychol* 1986;54:334-41.
- Rapport MD, DuPaul GJ, Stoner G, Birmingham BK, Masse G. Attention deficit disorder with hyperactivity: differential effects of methylphenidate on impulsivity. *Pediatrics* 1985;76:938-43.
- Rapport MD, Stoner G, DuPaul GJ, Birmingham BK, Tucker S. Methylphenidate in hyperactive children: differential effects of dose on academic, learning, and social behavior. *J Abnorm Child Psychol* 1985;13:227-43.- Barkley RA, Karlsson J, Pollard S, Murphy JV. Developmental changes in the mother-child interactions of hyperactive boys: effects of two dose levels of Ritalin. *J Child Psychol Psychiatry* 1985;26:705-15.

- Butter HJ, Lapierre Y, Firestone P, Blank A. Efficacy of ACTH 4-9 analog, methylphenidate, and placebo on attention deficit disorder with hyperkinesis. *Prog Neuropsychopharmacol Biol Psychiatry* 1984;8:661-4.
- Butter HJ, Lapierre Y, Firestone P, Blank A. A comparative study of the efficacy of ACTH4-9 analog, methylphenidate, and placebo on attention deficit disorder with hyperkinesis. *J Clin Psychopharmacol* 1983;3:226-30.
- Barkley RA, Karlsson J, Strzelecki E, Murphy JV. Effects of age and Ritalin dosage on the mother-child interactions of hyperactive children. *J Consult Clin Psychol* 1984;52:750-8.
  - Gualtieri CT, Hicks RE, Mayo JP, Schroeder SR. The persistence of stimulant effects in chronically treated children: further evidence of an inverse relationship between drug effects and placebo levels of response. *Psychopharmacology (Berl)* 1984;83:44-7.
  - Forness SR, Swanson JM, Cantwell DP, Guthrie D, Sena R. Response to stimulant medication across six measures of school-related performance in children with ADHD and disruptive behavior. *Behav Disord* 1992;18:42-53.
  - Ialongo NS, Lopez M, Horn W, Pascoe J, Greenberg G. Effects of psychostimulant medication on self-perceptions of competence, control, and mood in children with attention deficit hyperactivity disorder. *J Clin Child Psychol* 1994;23:161-73.
  - Tannock R, Schachar R, Logan G. Does methylphenidate induce overfocusing in hyperactive children? *J Clin Child Psychol* 1993;22:28-41.
  - Borden KA, Brown RT. Attributional outcomes: the subtle messages of treatments for attention deficit disorder. *Cognitive Therapy Res* 1989;13:147-60.
  - Richardson E, Kupietz S, Winsberg BG, Maitinsky S, Mendell N. Effects of methylphenidate dosage in hyperactive reading-disabled children: II. Reading achievement. *J Am Acad Child Adolesc Psychiatry* 1988;27:78-87.
- Kupietz S, Winsberg BG, Richardson E, Maitinsky S, Mendell N. Effects of methylphenidate dosage in hyperactive reading-disabled children: I. Behavior and cognitive performance effects. *J Am Acad Child Adolesc Psychiatry* 1988;27:70-7.
- Brown RT, Borden KA, Wynne ME, Spunt AL, Clingerman SR. Patterns of compliance in a treatment program for children with attention deficit disorder. *J Compliance Health Care* 1988;3:23-39.

- Barkley RA, Fischer M, Newby RF, Breen MJ. Development of a multimethod clinical protocol for assessing stimulant drug response in children with attention deficit disorder. *J Clin Child Psychol* 1988;17:14-24.
- Rapport MD, Jones JT, DuPaul GJ, Kelly KL, Gardner MJ, Tucker SB, et al. Attention deficit disorder and methylphenidate: group and single-subject analyses of dose effects on attention in clinic and classroom settings. *J Clin Child Psychol* 1987;16:329-38.
- Diamond IR, Tannock R, Schachar RJ. Response to methylphenidate in children with ADHD and comorbid anxiety. *J Am Acad Child Adolesc Psychiatry* 1999;38:402-9.
- Zeiner P, Bryhn G, Bjercke C, Truyen K, Strand G. Response to methylphenidate in boys with attention-deficit hyperactivity disorder. *Acta Paediatr* 1999;88:298-303.
- Stein MA, Blondis TA, Schnitzler ER, O'Brien T, Fishkin J, Blackwell B, et al. Methylphenidate dosing: twice daily versus three times daily. *Pediatrics* 1996;98:748-56.
- McBride MC. An individual double-blind crossover trial for assessing methylphenidate response in children with attention deficit. *J Pediatr* 1988;113:137-45.
- Fischer M, Newby R. Assessment of stimulant response in ADHD children using a refined multimethod clinical protocol. *J Clin Child Psychol* 1991;20:232-44.
- Castellanos FX, Giedd JN, Elia J, Marsh WL, Ritchie GF, Hamburger SD, et al. Controlled stimulant treatment of ADHD and comorbid Tourette's syndrome: effects of stimulant and dose. *J Am Acad Child Adolesc Psychiatry* 1997;36:589-96.
- Barkley RA. The effects of methylphenidate on the interactions of preschool ADHD children with their mothers. *J Am Acad Child Adolesc Psychiatry* 1988;27:336-41.
- Manos MJ, Short EJ, Findling RL. Differential effectiveness of methylphenidate and Adderall in school-age youths with attention-deficit/hyperactivity disorder. *J Am Acad Child Adolesc Psychiatry* 1999;38:813-9.
- Rapport MD, Stoner G, DuPaul GJ, Kelly KL, Tucker SB, Schoeler T. Attention deficit disorder and methylphenidate: a multilevel analysis of dose-response effects on children's impulsivity across settings. *J Am Acad Child Adolesc Psychiatry* 1988;27:60-9.

- Pelham WE, Vodde-Hamilton M, Murphy DA, Greenstein J, Vallano G. The effects of methylphenidate on ADHD adolescents in recreational, peer group, and classroom settings. *J Clin Child Psychol* 1991;20:293-300.
  - Wigal SB, Gupta S, Guinta D, Swanson JW. Reliability and validity of the SKAMP rating scale in a laboratory school setting. *Psychopharmacol Bull* 1998;34:47-53.
- 

[\[Return to text\]](#)
